# Supplementary material for: Long-Term Protection of Retinal Ganglion Cells and Visual Function by Brain-Derived Neurotrophic Factor in Mice With Ocular Hypertension
Source: PubMed Central journal article supplement — Invest Ophthalmol Vis Sci. 2016 Jul 15;57(8):3793–802. doi: 10.1167/iovs.16-19825 (PMC4961002; doi:10.1167/iovs.16-19825), 2016-07-15

## **Supplementary Data**

### **Long-Term Protection of Retinal Ganglion Cells and Visual Function by Brain-derived Neurotrophic Factor in Mice with Ocular Hypertension**

**Liang Feng<sup>1,2</sup>, Hui Chen<sup>1</sup>, Ji Yi<sup>3</sup>, John B. Troy<sup>3</sup>, Hao F. Zhang<sup>1,3</sup>, and Xiaorong Liu<sup>1,2+</sup>**

1. Department of Ophthalmology, Feinberg School of Medicine, Northwestern University, Chicago, Illinois 60611, USA

2. Department of Neurobiology, Weinberg College of Arts and Sciences, Northwestern University, Evanston, Illinois 60208, USA

3. Department of Biomedical Engineering, Robert R. McCormick School of Engineering and Applied Science, Northwestern University, Evanston, Illinois 60208, USA

+: Corresponding author: [xiaorong-liu@northwestern.edu](mailto:xiaorong-liu@northwestern.edu); Office: 847-467-0529; Mail address: Hogan 2-160, 2205 Tech Drive, Northwestern University, Evanston, IL, 60208;

## Supplementary Figure Legends

**S-Fig. 1.** Overexpression of BDNF did not change the overall morphology of the mouse retina.

(A) Retinal sections stained with DAPI (blue) from mice injected with tamoxifen or overexpressing BDNF. (B) Retinal sections immuno-stained by PKC $\alpha$  (green) and calretinin (red) antibodies. ONL: outer nuclear layer; INL: inner nuclear layer; GCL: ganglion cell layer. Scale bar: 50  $\mu$ m. This figure is related to Figs. 1-2.

**S-Fig. 2.** Visual acuity was comparable in BS/+, BS/BS, BS/+::Cre transgenic mice with or without tamoxifen injection. Red arrow marks the BS/BS or BS/+::Cre transgenic mice injected with tamoxifen, i.e. BDNF\_OE mice. Sample numbers are given in the bar graph. This figure is related to Fig. 3.

**S-Fig. 3.** Overexpression of BDNF reduced the dendritic degeneration of ON RGCs in mice with sustained ocular hypertension. Left: Projected images of confocal Z-stacks for an ON RGC. Z-stack images of YFP-expressing RGCs were projected onto a two-dimensional plane to measure the field size of RGC arbors as described in Feng et al., 2013 [28]. Right: The cumulative distributions of the dendritic field sizes of ON and ON-OFF cells from control and BDNF\_OE mice. This figure is related to Fig. 7.

S-Fig. 1

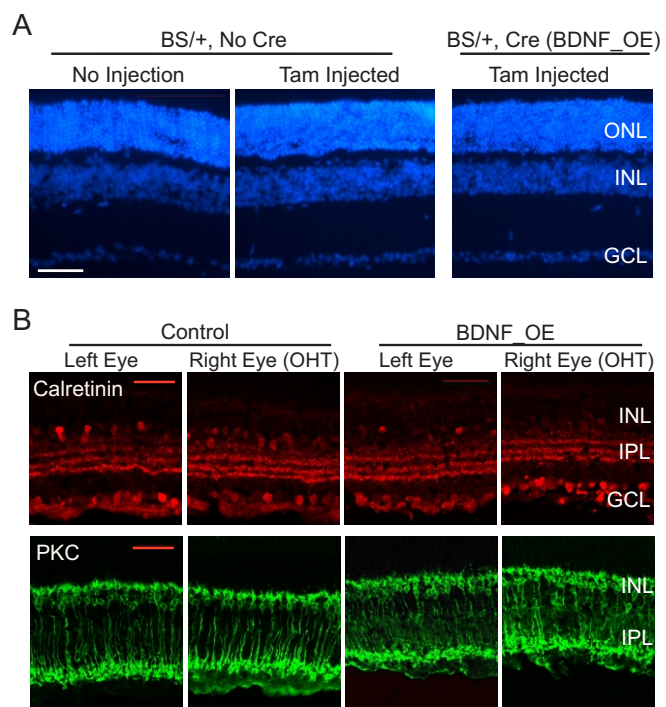

S-Fig. 2

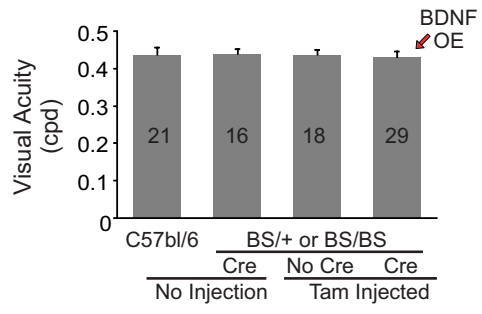

S-Fig. 3

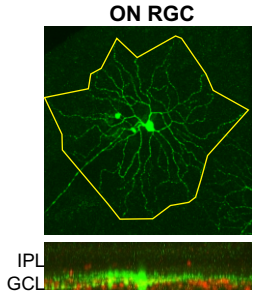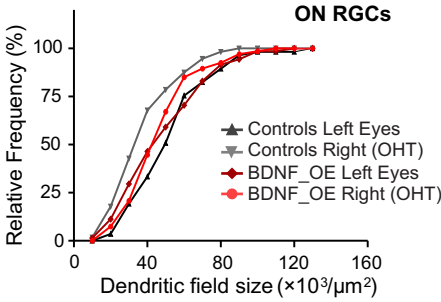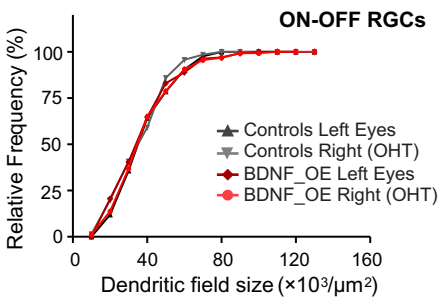

Supplement: i1552-5783-57-8-3793-s01.pdf [file i1552-5783-57-8-3793-s01.pdf]
